# Supplementary material for: Improving the sulfite-detection performance of a fluorescent probe via post-synthetic modification with a metal–organic framework
Source: Royal Society of Chemistry journal article supplement (doi:10.1039/d4tb01754d), 2024-01-01
Supplement: d4tb01754d1.pdf [file d4tb01754d1.pdf]

## Supporting Information

### **Improving Sulfite Detection Performance of a Fluorescent Probe via Post-synthetic Modification with Metal-Organic Framework**

**Jing-Yi Shi,<sup>a</sup> Bin Wang,<sup>c</sup> Xin-Yue Cui,<sup>b</sup> Xiao-Wei Hu,<sup>\*b</sup> Hai-Liang Zhu,<sup>\*c</sup> and  
Yu-Shun Yang<sup>\*a, c</sup>**

<sup>a</sup> Jinhua Advanced Research Institute, Jinhua 321019, China;

<sup>b</sup> School of Chemistry and Chemical Engineering, Linyi University, Linyi, Shandong 276005, China;

<sup>c</sup> State Key Laboratory of Pharmaceutical Biotechnology, School of Life Sciences, Nanjing University, Nanjing, 210023, China.

*\*Corresponding authors. E-mail: hxwfly2009@163.com; zhuhl@nju.edu.cn; ys\_yang@nju.edu.cn.*

### **Table of Contents**

|                                                                                           |   |
|-------------------------------------------------------------------------------------------|---|
| The general synthesis route of the small-molecule probe <b>DQA</b> .....                  | 2 |
| The TGA curves of UiO-66-NH <sub>2</sub> and <b>UiO-66-NH-DQA</b> .....                   | 2 |
| Comparison on the HNMR spectra of UiO-66-NH <sub>2</sub> and <b>UiO-66-NH-DQA</b> .....   | 3 |
| Water volume for dissolving 0.5 μmol <b>UiO-66-NH-DQA</b> .....                           | 3 |
| Absorption spectra of <b>DQA-E</b> and <b>UiO-66-NH-DQA</b> with and without sulfite..... | 4 |
| TEM image and weigh percentage after reacting UiO-66-NH <sub>2</sub> with sulfite .....   | 4 |
| Fluorescence spectra of <b>UiO-66-NH-DQA</b> with various concentrations of sulfite.....  | 5 |
| Cell viability of HepG2 and L02 cells incubated with <b>UiO-66-NH-DQA</b> .....           | 5 |
| Confocal images of the <b>UiO-66-NH-DQA</b> uptake and quantitative analysis.....         | 6 |
| Quantitative analysis of the patches in Figure 6.....                                     | 6 |
| Comparison between <b>UiO-66-NH-DQA</b> and the recently reported probes for sulfite..    | 7 |
| NMR and HRMS spectra .....                                                                | 8 |

## Supplementary Figures and Table

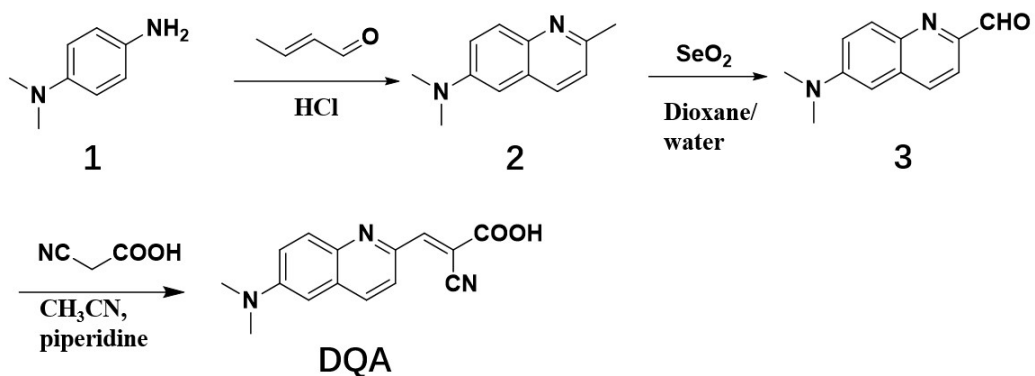

**Figure S1.** The general synthesis route of the small-molecule probe **DQA**.

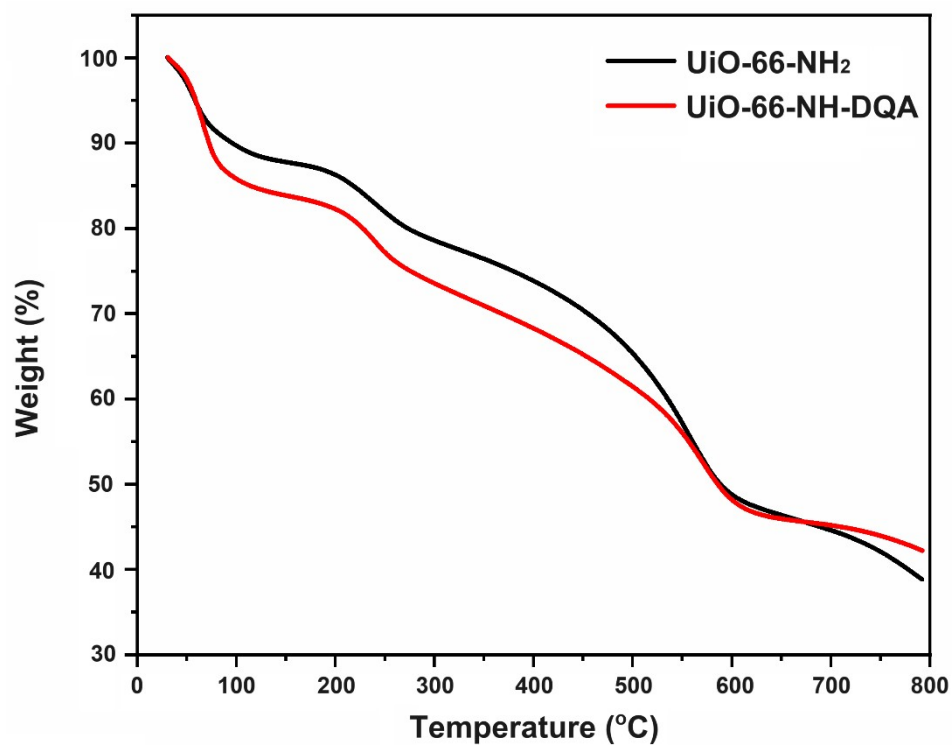

**Figure S2.** The TGA curves of UiO-66-NH<sub>2</sub> and UiO-66-NH-DQA.

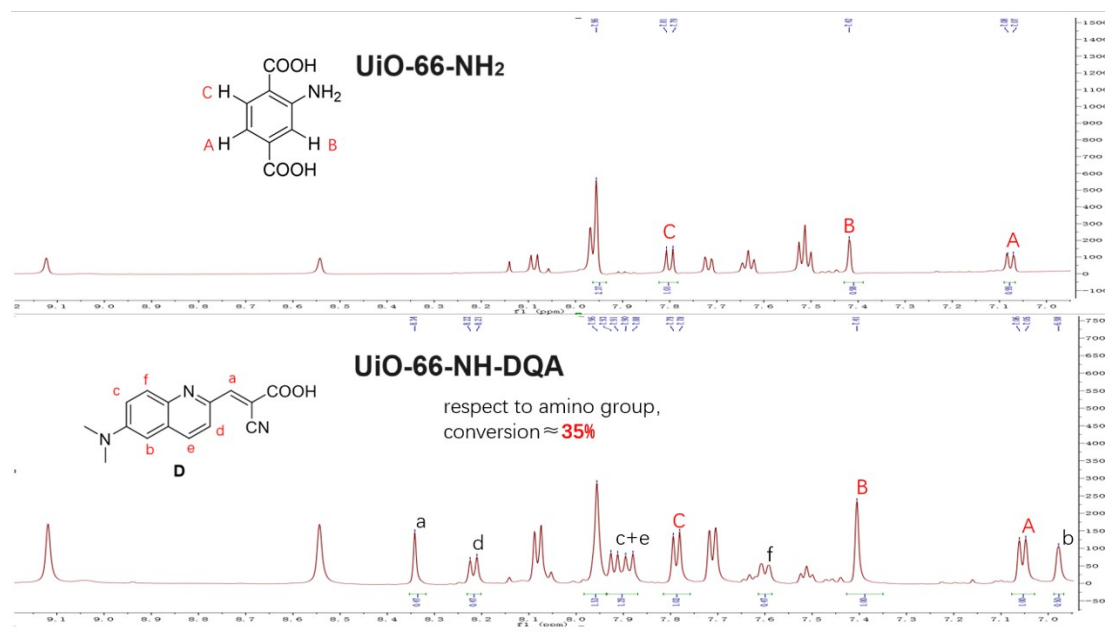

**Figure S3.** The comparison on the <sup>1</sup>H NMR spectra of UiO-66-NH<sub>2</sub> and UiO-66-NH-DQA.

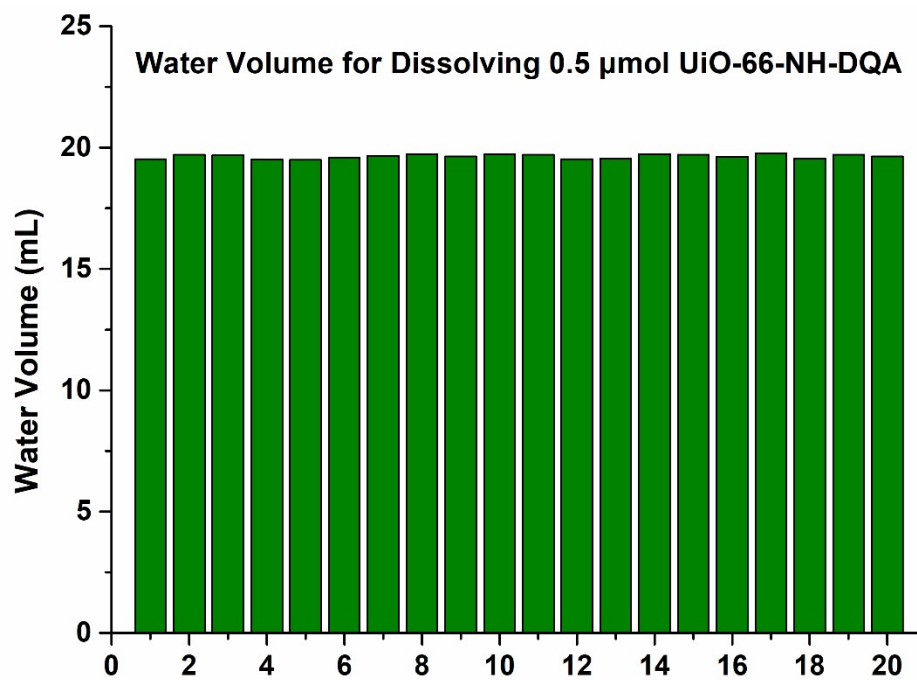

**Figure S4.** The water volume for dissolving 0.5  $\mu$ mol UiO-66-NH-DQA.

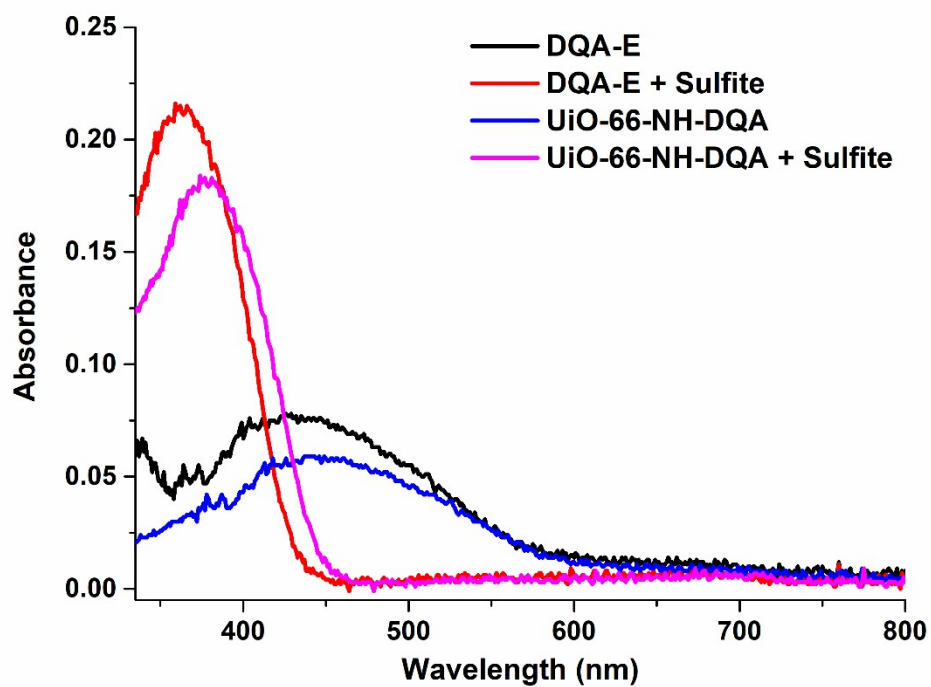

**Figure S5.** The absorption spectra of **DQA-E** (10  $\mu\text{M}$ ) and **UiO-66-NH-DQA** in the absence and presence of sulfite (500  $\mu\text{M}$ ) in the solution system.

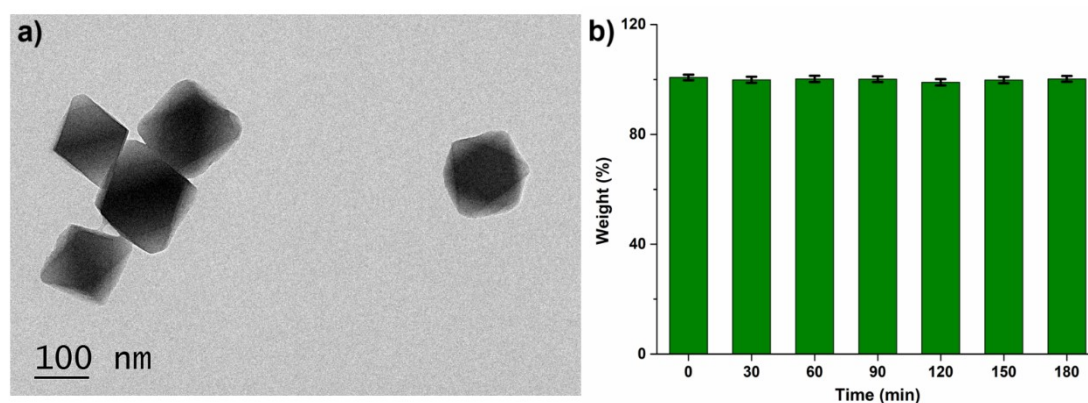

**Figure S6.** The (a) TEM image and (b) time-dependent weigh percentage analysis after reacting **UiO-66-NH<sub>2</sub>** (5  $\mu\text{M}$ ) with sulfite (500  $\mu\text{M}$ ) in 3 h. Conditions: pH 7.4, 37  $^{\circ}\text{C}$ .

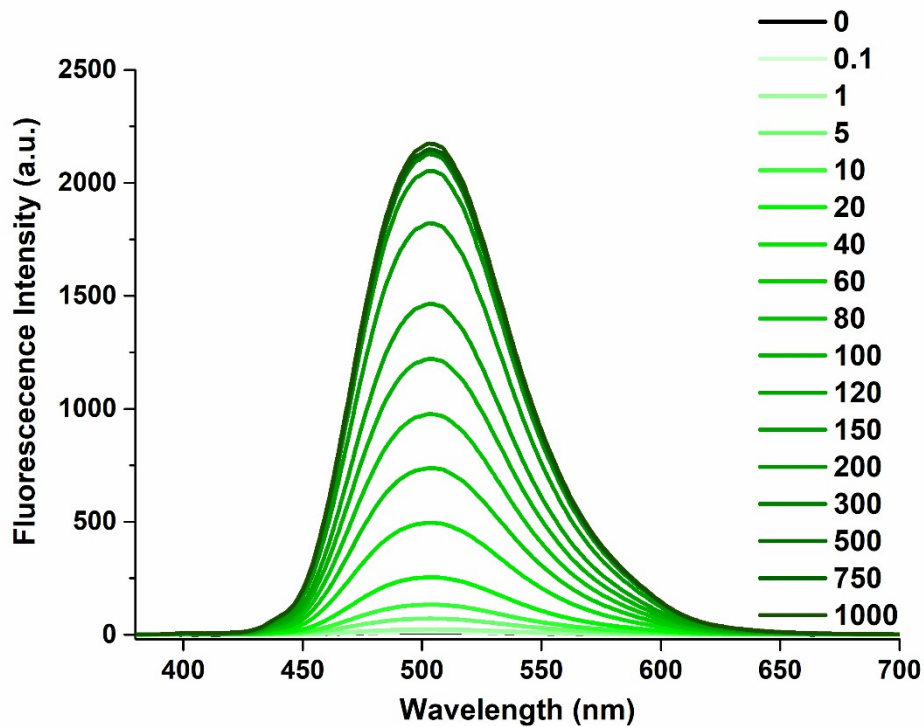

**Figure S7.** The fluorescence spectra of UiO-66-NH-DQA with various concentrations of sulfite (0-1000  $\mu\text{M}$ ). Conditions: pH 7.4, 37  $^{\circ}\text{C}$ , 30 min, 5 nm \* 5 nm, 500 V,  $\lambda_{\text{ex}}$  = 364 nm.

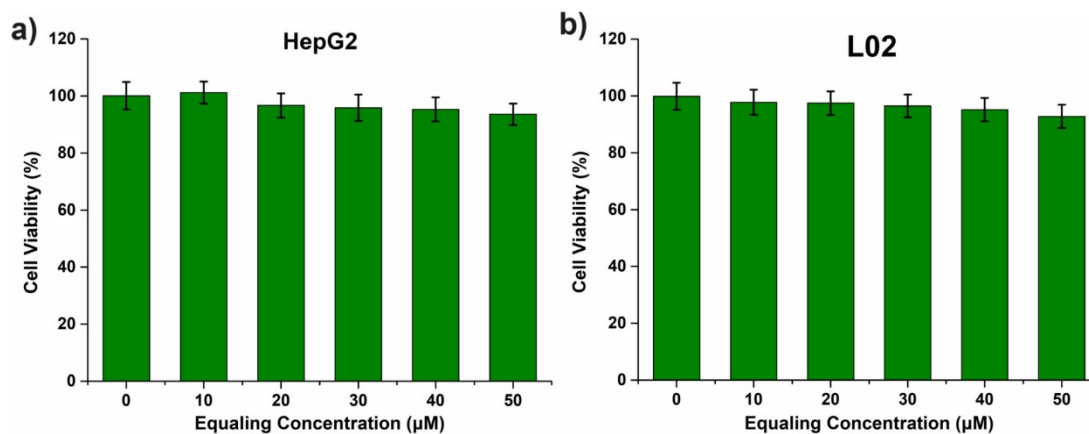

**Figure S8.** The Cell viability of (a) HepG2 and (b) L02 cells incubated with UiO-66-NH-DQA at different equaling concentrations (0-50  $\mu\text{M}$ ) of for 24 h at 37  $^{\circ}\text{C}$ .

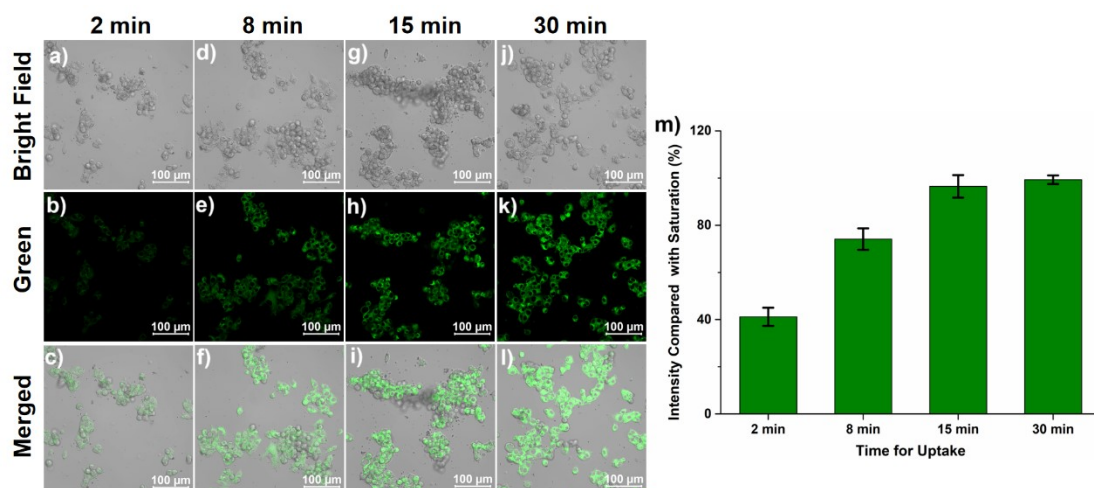

**Figure S9.** The confocal images of living HepG2 cells incubated with 150 μM sulfite for 30 min, and then with **UiO-66-NH-DQA** for different time conditions to suggest the uptake: (a-c) 2 min; (d-f) 8 min; (g-i) 15 min, and (j-l) 30 min. (m) The quantitative analysis. Conditions:  $\lambda_{\text{ex}} = 364 \text{ nm}$ ; Green channel: 440-600 nm, scale bar: 100 μm.

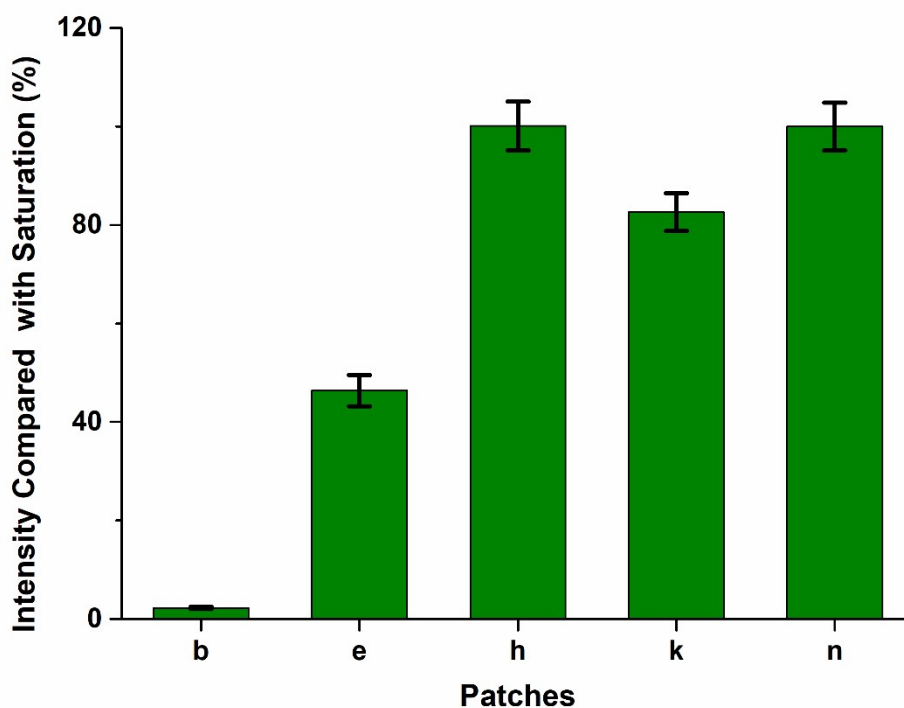

**Figure S10.** The quantitative analysis of the patches in Figure 6.

**Table S1.** The comparison between **UiO-66-NH-DQA** and the recently reported probes for sulfite.

| Sources          | $\lambda_{ex}/\lambda_{em}$<br>(nm) | Response<br>time (min) | Linear<br>interval<br>( $\mu\text{M}$ ) | LOD<br>( $\mu\text{M}$ ) | Response<br>fold | Applications                        |
|------------------|-------------------------------------|------------------------|-----------------------------------------|--------------------------|------------------|-------------------------------------|
| Ref 23           | 420/508                             | 60                     | 200                                     | 1.87                     | 6                | HeLa cells, Food samples            |
| Ref 24           | 480/550                             | 14                     | 100                                     | 0.16                     | 90               | HeLa cells, LPS-induced mice        |
| Ref 25           | 413/528                             | > 14                   | 15                                      | 0.2526                   | 16               | HeLa cells, Food samples            |
| Ref 26           | 400/475                             | 0.67                   | 44                                      | 0.038                    | 6.5              | HeLa cells, Mice, Test strips       |
| Ref 27           | 400/580                             | Not given              | 200                                     | 0.42                     | 4                | Food samples, Test strips           |
| Ref 28           | 360/432                             | Not given              | 100                                     | 0.003                    | ~ 25             | HepG2 cells                         |
| Ref 29           | 419/559                             | 6                      | 18                                      | 0.823                    | ~25              | Living cells                        |
| Ref 30           | 405/482                             | 0.25                   | 500                                     | 0.086                    | 2                | Chinese herbs, HepG2 cells          |
| Ref 31           | 430/555                             | 0.13                   | 4                                       | 3.64                     | 5                | HeLa cells, Liver injury mice       |
| Ref 32           | 420/485                             | 20                     | 2                                       | 0.024                    | 4                | HeLa cells                          |
| Ref 33           | 417/487                             | 5                      | 12                                      | 0.044                    | 10               | HeLa, HepG2, L02 cells              |
| Ref 34           | 400/494                             | 60                     | 80                                      | 1.1                      | 9                | HeLa, HepG2, L02 cells              |
| Ref 35           | 411/489                             | 60                     | 80                                      | 2.8                      | 7.5              | HeLa, HepG2, L02 cells              |
| Ref 36           | 425/516                             | 1                      | 22.5                                    | 0.25                     | 30               | Food samples, Test strips           |
| Ref 37           | 500/575                             | Not given              | 20                                      | 0.06                     | 7                | HeLa cells, Tumor tissue, Zebrafish |
| Ref 38           | 290/339                             | 1                      | 24                                      | 0.06315                  | 16               | HeLa cells, Food samples            |
| Ref 39           | 365/560                             | Not given              | 100                                     | 0.31                     | 2                | HeLa cells, Test strips             |
| Ref 40           | 364/483                             | 50                     | 150                                     | 0.013                    | 60               | HeLa cells                          |
| DQA-E            |                                     |                        |                                         |                          |                  |                                     |
| <b>This work</b> | <b>364/503</b>                      | <b>15</b>              | <b>150</b>                              | <b>0.025</b>             | <b>340</b>       | <b>HepG2 cells</b>                  |

## NMR and HRMS spectra

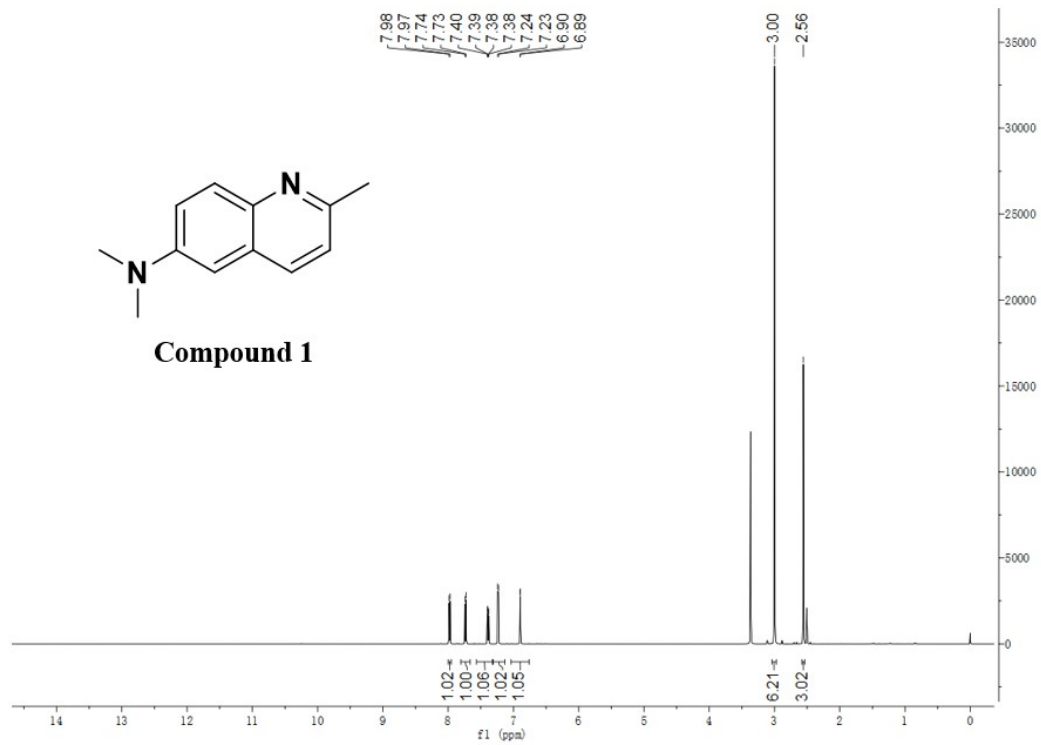

<sup>1</sup>H NMR spectrum of compound **1** (600 MHz, in DMSO-*d*<sub>6</sub>).



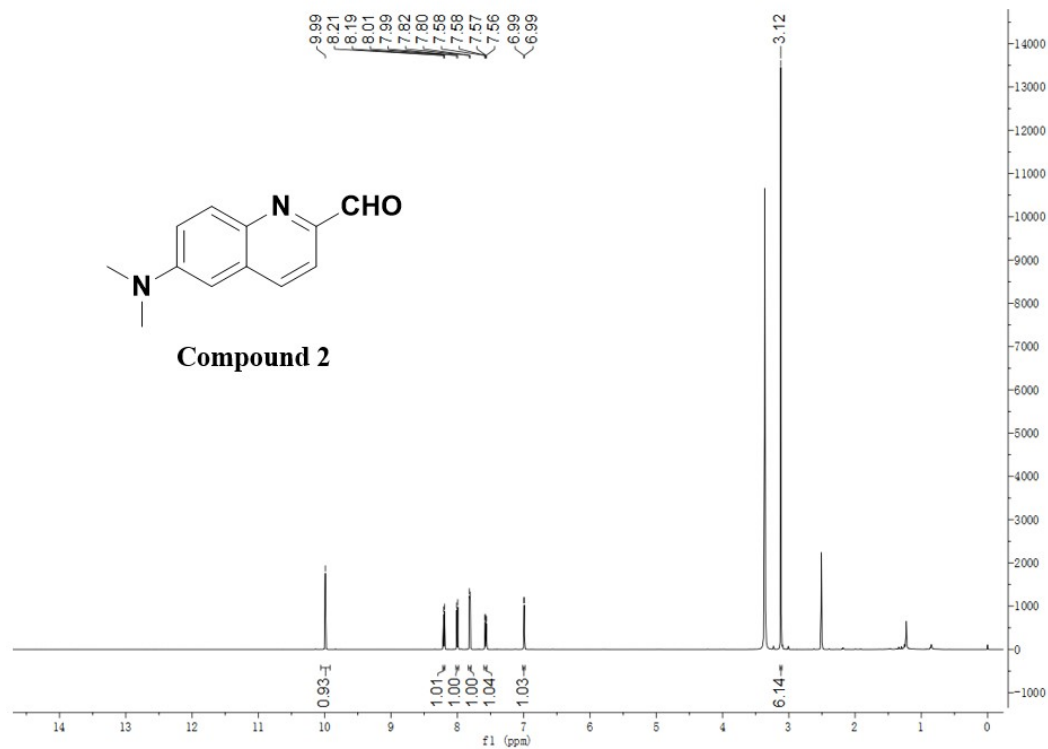

<sup>1</sup>H NMR spectrum of compound **2** (600 MHz, in DMSO-*d*<sub>6</sub>).

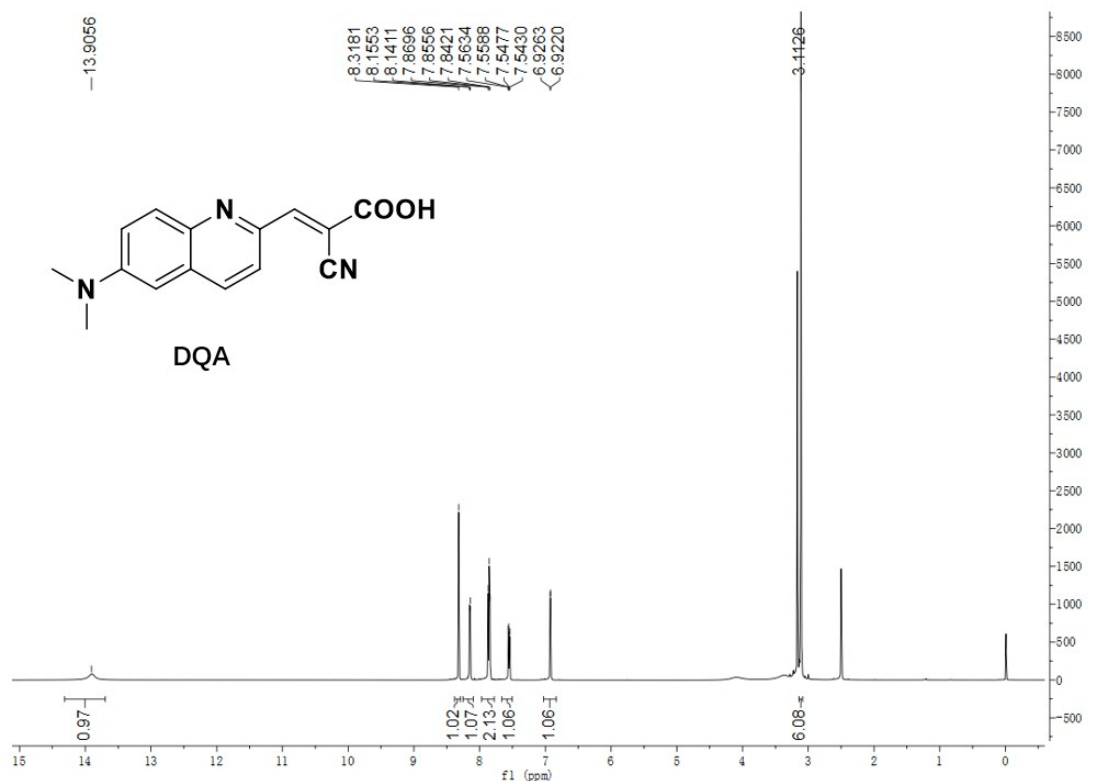

<sup>1</sup>H NMR spectrum of **DQA** (600 MHz, in DMSO-*d*<sub>6</sub>).

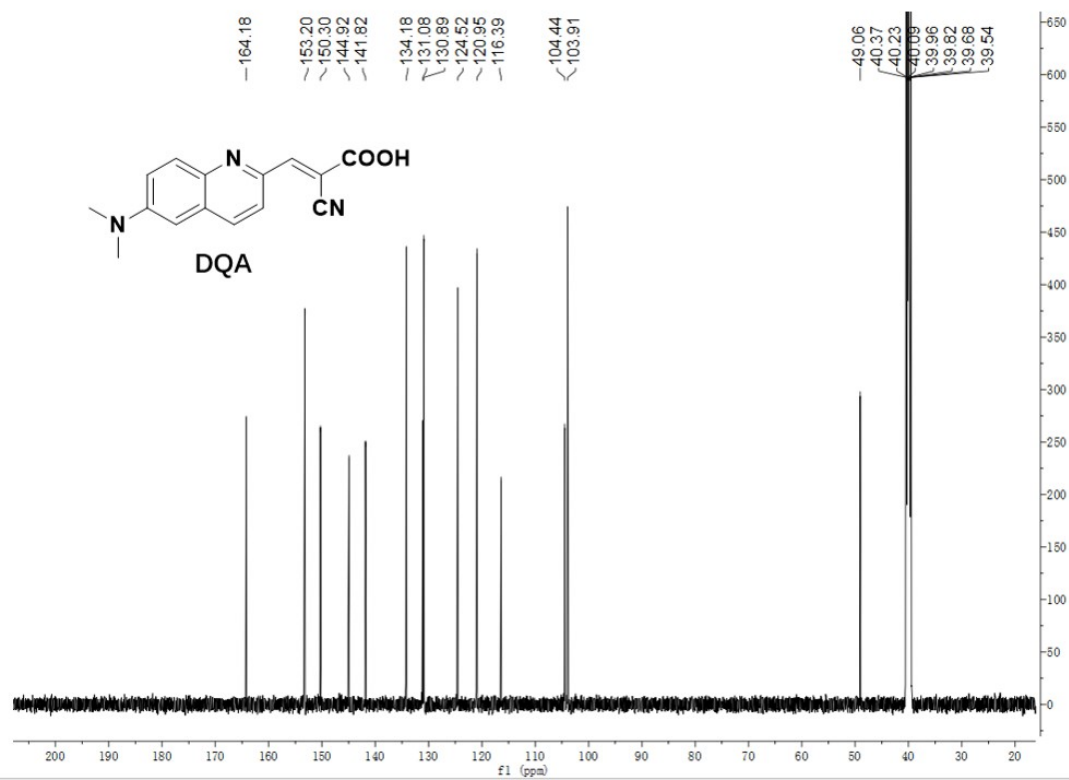

$^{13}\text{C}$  NMR spectrum of **DQA** (151 MHz, in  $\text{DMSO-}d_6$ ).

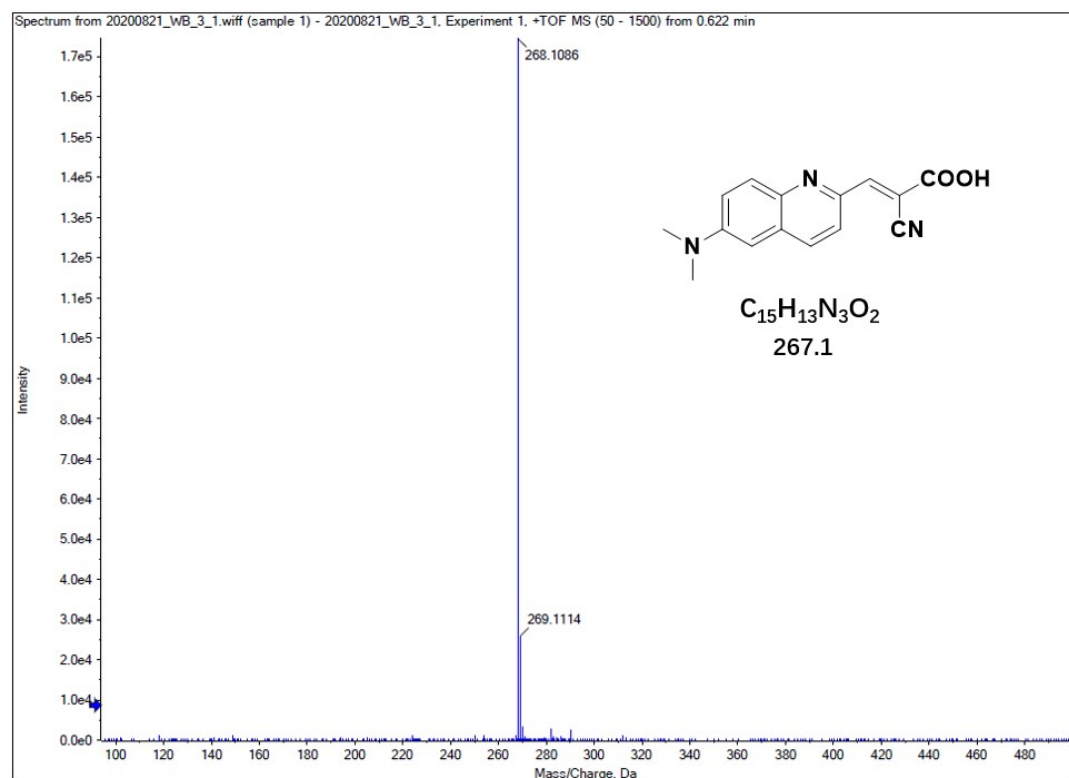

HRMS spectrum of **DQA** in acetonitrile.
